# Supplementary material for: A cobalt-based polyoxometalate nanozyme with high peroxidase-mimicking activity at neutral pH for one-pot colorimetric analysis of glucose
Source: Royal Society of Chemistry journal article supplement (doi:10.1039/c8tb01853g), 2018-01-01
Supplement: c8tb01853g1.pdf [file c8tb01853g1.pdf]

Supplementary Information for

**A cobalt-based polyoxometalate nanozyme with high  
peroxidase-mimicking activity at neutral pH for one-pot  
colorimetric analysis of glucose**

Yanfang He,<sup>a,b</sup> Xin Li,<sup>a</sup> Xuechao Xu,<sup>a</sup> Jianming Pan,<sup>a</sup> Xiangheng Niu<sup>a,\*</sup>

<sup>a</sup> Institute of Green Chemistry and Chemical Technology, School of Chemistry and  
Chemical Engineering, Jiangsu University, Zhenjiang 212013, China

<sup>b</sup> School of Material Science and Engineering, Jiangsu University, Zhenjiang 212013,  
China

\* Corresponding author. E-mail: niuxiangheng@126.com

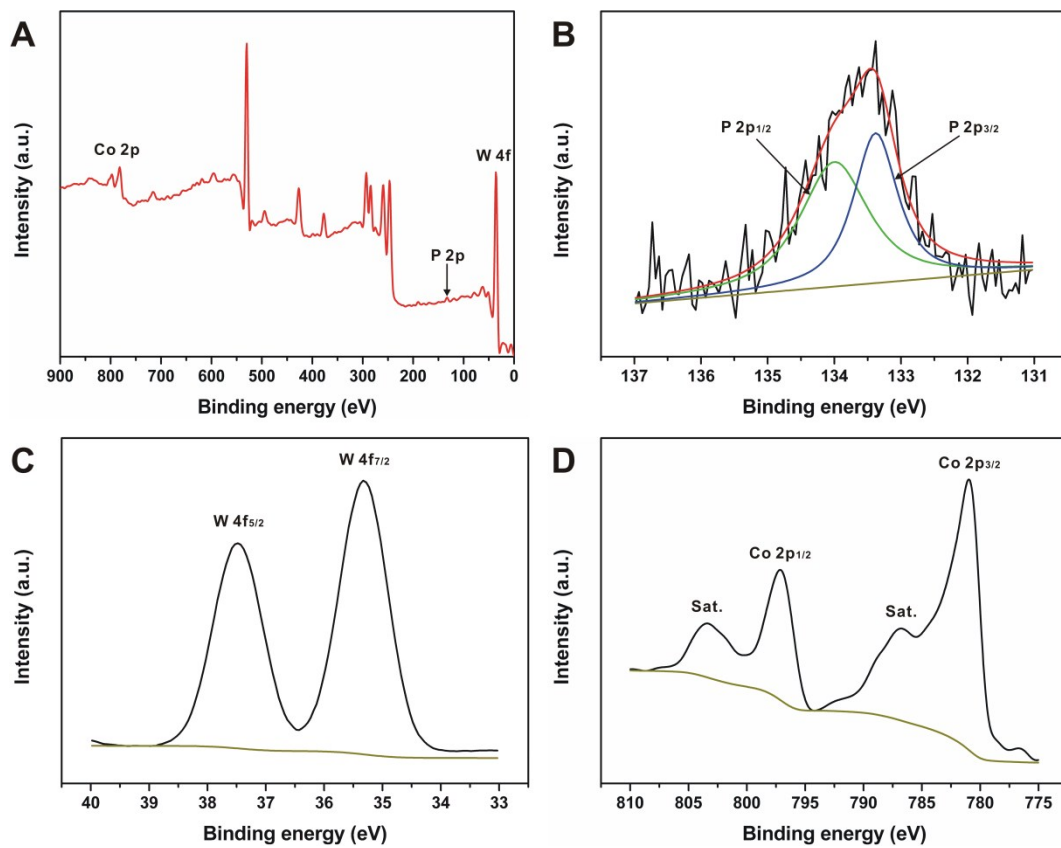

**Figure S1.** (A) shows the full XPS pattern of the  $\text{CoPW}_{11}\text{O}_{39}$  nanozyme. (B), (C), and (D) depict the fine P 2p, W 4f, and Co 2p XPS patterns, respectively.

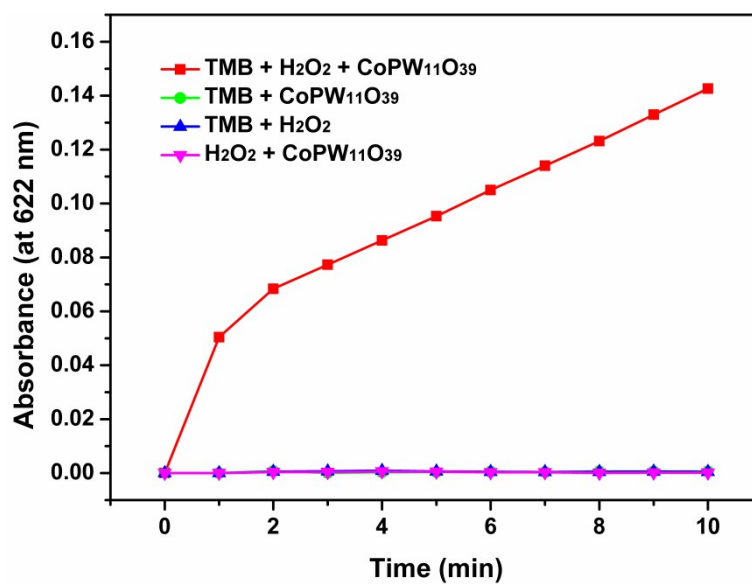

**Figure S2.** Absorbance changes of different systems upon reaction time.

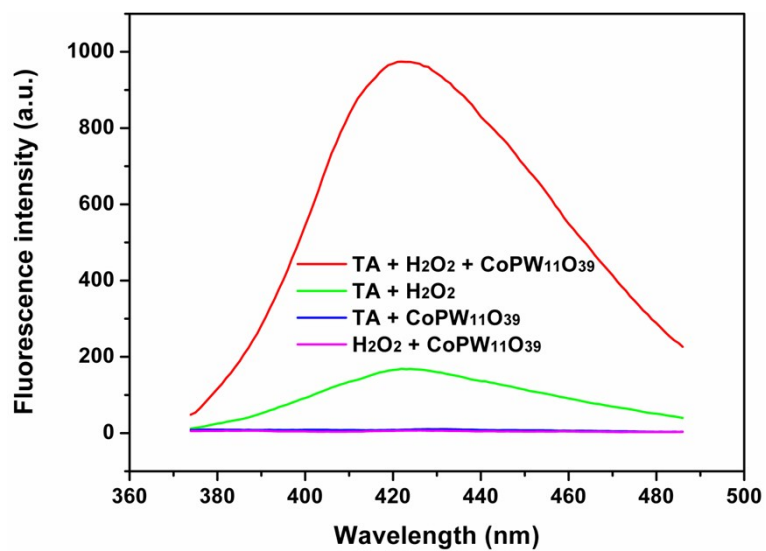

**Figure S3.** Fluorescence spectra of different systems. The excitation wavelength was 314 nm.

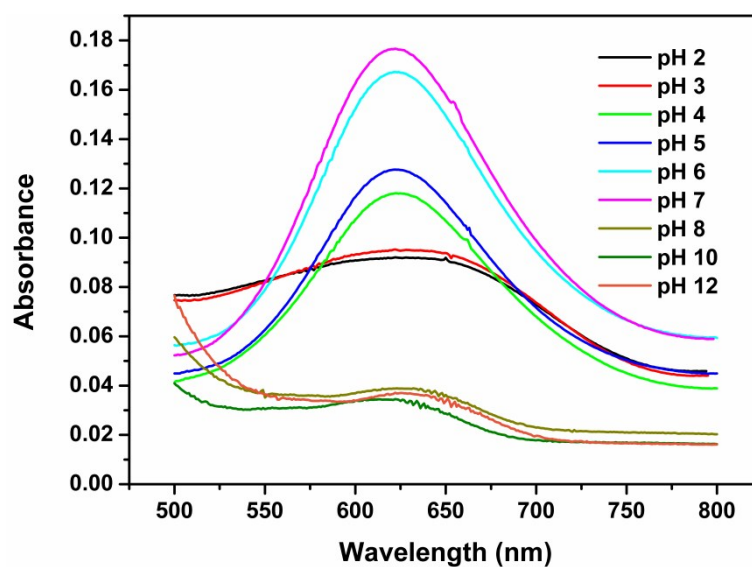

**Figure S4.** UV-Vis spectra of the  $\text{CoPW}_{11}\text{O}_{39} + \text{H}_2\text{O}_2 + \text{TMB}$  system in 0.1 M buffers with different pH values.

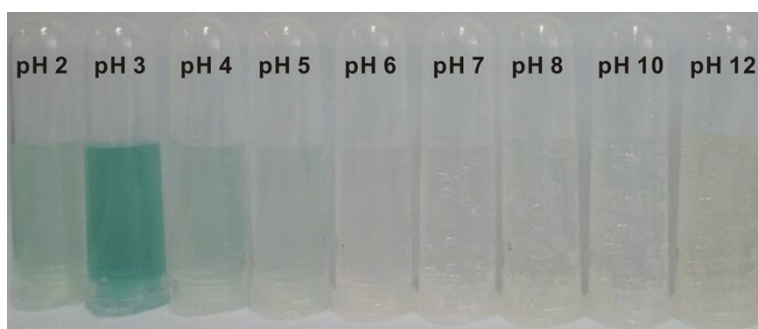

**Figure S5.** Photograph of the  $\text{CoPW}_{11}\text{O}_{39}+\text{H}_2\text{O}_2+\text{ABTS}$  system in 0.1 M buffers with different pH values.

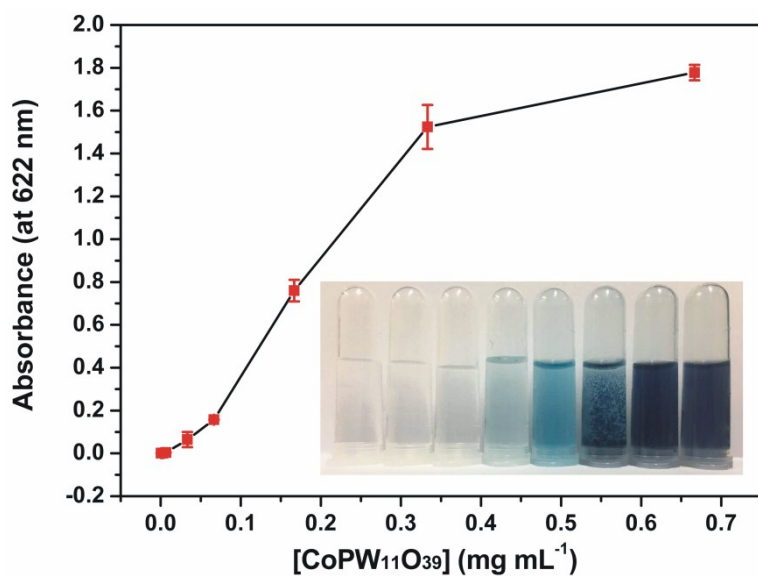

**Figure S6.** Effect of nanozyme concentration on the catalyzed color reaction.

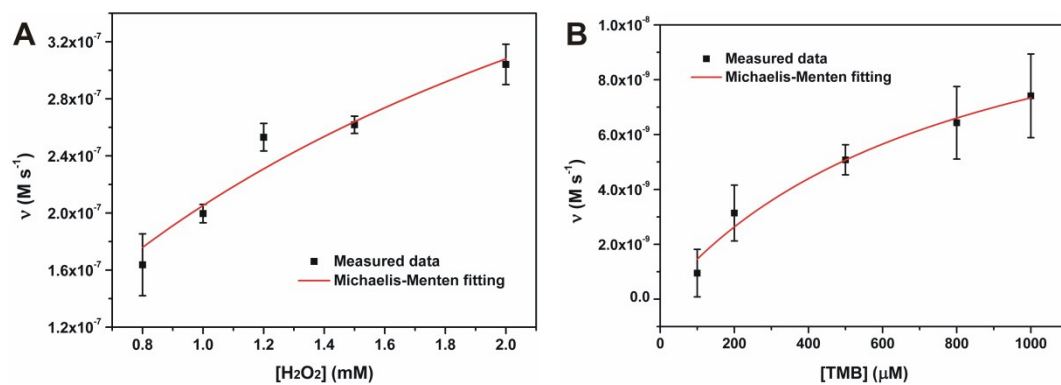

**Figure S7.** Steady-state kinetic measurements of the  $\text{CoPW}_{11}\text{O}_{39}$  nanozyme toward (A)  $\text{H}_2\text{O}_2$  and (B) TMB, respectively.

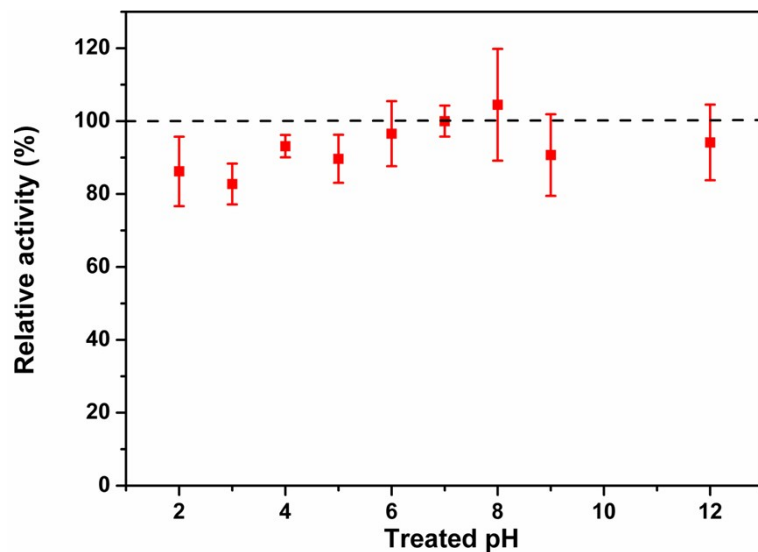

**Figure S8.** Robustness of the CoPW<sub>11</sub>O<sub>39</sub> nanozyme against harsh pH. The nanozyme was first treated by incubating it in 0.1 M buffers with different pH values for 2 h, and then its activity was measured under standard conditions.

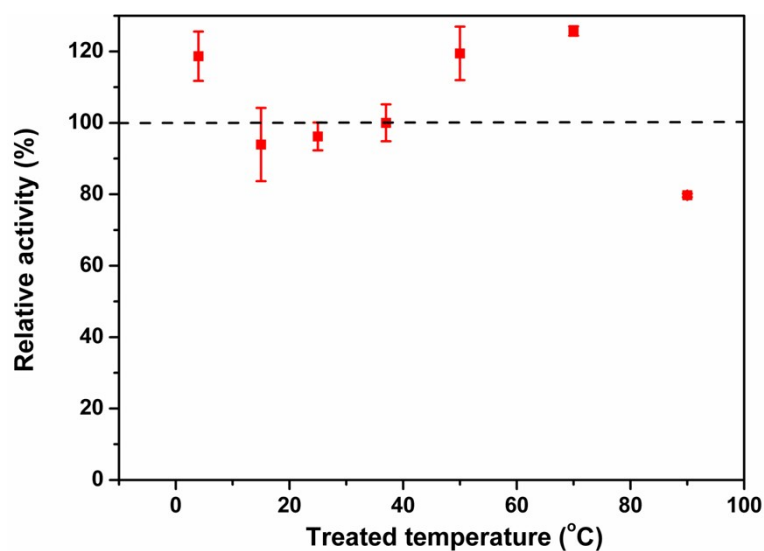

**Figure S9.** Robustness of the CoPW<sub>11</sub>O<sub>39</sub> nanozyme against harsh temperature. The nanozyme was first treated by incubating it in 0.1 M buffer (pH 7.0) at various temperatures for 2 h, and then its activity was measured under standard conditions.

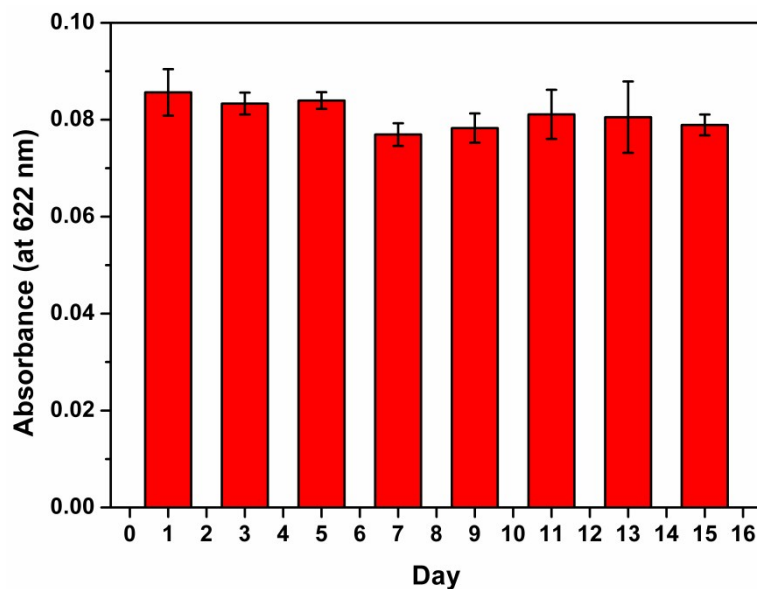

**Figure S10.** Stability of the CoPW<sub>11</sub>O<sub>39</sub> nanozyme for glucose detection.

**Table S1.** Comparison of our peroxidase mimic with other peroxidase-mimicking nanozymes for colorimetric detection of glucose.

| Peroxidase mimic                          | Linear range (mM) | LOD ( $\mu$ M) | Ref. |
|-------------------------------------------|-------------------|----------------|------|
| Fe <sub>3</sub> O <sub>4</sub> MNPs       | 0.05~1            | 30             | 1    |
| MNP/NG                                    | Up to 18          | 57.9           | 2    |
| FeNPs@Co <sub>3</sub> O <sub>4</sub> HNCs | 0.0005~0.03       | 50             | 3    |
| WSe <sub>2</sub> nanosheets               | 0.01~0.06         | 10             | 4    |
| Fe-MIL-88NH <sub>2</sub>                  | 0.002~0.3         | 0.48           | 5    |
| Cu <sub>0.89</sub> Zn <sub>0.11</sub> O   | 0.025~0.5         | 1.5            | 6    |
| 3D GH-5                                   | 0.005~0.5         | 0.8            | 7    |
| GO-COOH                                   | 0.001~0.02        | 1              | 8    |

## References

1. H. Wei and E. K. Wang, *Anal. Chem.*, 2008, **80**, 2250-2254
2. W. J. Zhang, C. P. Chen, D. X. Yang, G. X. Dong, S. J. Jia, B. X. Zhao, L. Yan, Q. Q. Yao, A. Sunna and Y. Liu, *Adv. Mater. Interfaces*, 2016, **3**, 1600590
3. J. Zhao, W. F. Dong, X. D. Zhang, H. X. Chai and Y. M. Huang, *Sens. Actuators., B*, 2018, **263**, 575-584.
4. T. M. Chen, X. J. Wu, J. X. Wang and G. W. Yang, *Nanoscale*, 2017, **9**, 11806-11813.
5. Y. L. Liu, X. J. Zhao, X. X. Yang and Y. F. Li, *Analyst*, 2013, **138**, 4526-4531.
6. A. P. Nagvenkar and A. Gedanken, *ACS Appl. Mater. Interfaces*, 2016, **8**, 22301-22308.
7. Q. Q. Wang, X. P. Zhang, L. Huang, Z. Q. Zhang and S. J. Dong, *ACS Appl. Mater. Interfaces*, 2017, **9**, 7465-7471.
8. Y. J. Song, K. G. Qu, C. Zhao, J. S. Ren and X. G. Qu, *Adv. Mater.*, 2010, **22**, 2206-2210.
